# Supplementary material for: Magnetic combined cross-linked enzyme aggregates of horseradish peroxidase and glucose oxidase: an efficient biocatalyst for dye decolourization
Source: Royal Society of Chemistry journal article supplement (doi:10.1039/c6ra12009a), 2016-01-01
Supplement: c6ra12009a1.pdf [file c6ra12009a1.pdf]

## Electronic Supplementary data

### Magnetic combined cross-linked enzyme aggregates of horseradish peroxidase and glucose oxidase: an efficient biocatalyst for dye decolourization

Liya Zhou <sup>a,b</sup>, Wei Tang <sup>a</sup>, Yanjun Jiang <sup>a,b\*</sup>, Li Ma <sup>a</sup>, Ying He <sup>a</sup>, Jing Gao <sup>a,b\*</sup>

<sup>a</sup> School of Chemical Engineering and Technology, Hebei University of Technology, Tianjin, 300130, P.R. China

<sup>b</sup> Hebei Provincial Key Lab of Green Chemical Technology and High Efficient Energy Saving, Hebei University of Technology, Tianjin, 300130, P.R. China

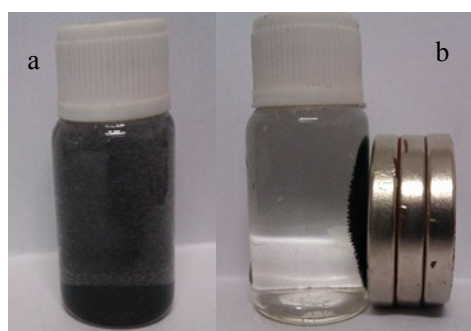

Fig. S1 Separation of magnetic combi-CLEAs

(a) magnetic combi-CLEAs dispersed in solution, (b) magnetic combi-CLEAs attracted by permanent magnet
